# Supplementary material for: The Families and Schools for Health Project: A Longitudinal Cluster Randomized Controlled Trial Targeting Children with Overweight and Obesity
Source: MDPI journal article supplement (doi:10.3390/ijerph18168744), 2021-08-19
Supplement: s1 [file s1]

**Supplemental Table S1.** Full Table of Results for Dummy Coded Intervention Conditions

|                           | <sup>a</sup> Raw BMI |           |          | <sup>b</sup> BMI-M% |           |          |
|---------------------------|----------------------|-----------|----------|---------------------|-----------|----------|
|                           | <i>B</i>             | <i>SE</i> | <i>p</i> | <i>B</i>            | <i>SE</i> | <i>p</i> |
| Intercept                 | 1.60                 | 0.05      | 0.00     | 9.21                | 1.90      | 0.00     |
| Wave                      | 0.14                 | 0.02      | 0.00     | 2.22                | 0.56      | 0.00     |
| Overwt.                   | 0.25                 | 0.06      | 0.00     | 7.90                | 2.48      | 0.00     |
| Obese                     | 0.70                 | 0.06      | 0.00     | 26.36               | 2.64      | 0.00     |
| FL                        | -0.03                | 0.06      | 0.57     | -0.56               | 2.50      | 0.82     |
| FL+FD                     | -0.01                | 0.06      | 0.82     | -0.01               | 2.68      | 0.99     |
| FL+PG                     | -0.01                | 0.06      | 0.82     | -0.11               | 2.54      | 0.96     |
| FL+FD+PG                  | 0.01                 | 0.06      | 0.81     | 0.54                | 2.47      | 0.83     |
| FL X Wave                 | -0.03                | 0.02      | 0.18     | -0.75               | 0.71      | 0.29     |
| FL+FD X Wave              | -0.04                | 0.02      | 0.09     | -0.87               | 0.78      | 0.26     |
| FL+PG X Wave              | 0.00                 | 0.02      | 0.97     | 0.05                | 0.72      | 0.95     |
| FL+FD+PG X Wave           | 0.01                 | 0.02      | 0.66     | 0.66                | 0.71      | 0.35     |
| Overwt. X Wave            | 0.00                 | 0.02      | 0.99     | 1.03                | 0.74      | 0.17     |
| Obese X Wave              | -0.01                | 0.03      | 0.82     | 2.27                | 0.86      | 0.01     |
| Overwt. X FL              | 0.00                 | 0.08      | 0.97     | -0.33               | 3.24      | 0.92     |
| Obese X FL                | 0.08                 | 0.08      | 0.33     | 2.90                | 3.46      | 0.40     |
| Overwt. X FL+FD           | 0.00                 | 0.08      | 0.99     | -0.21               | 3.44      | 0.95     |
| Obese X FL+FD             | -0.02                | 0.09      | 0.81     | -0.98               | 3.75      | 0.79     |
| Overwt. X FL+PG           | -0.07                | 0.08      | 0.38     | -2.37               | 3.34      | 0.48     |
| Obese X FL+PG             | -0.01                | 0.08      | 0.90     | -0.30               | 3.34      | 0.93     |
| Overwt. X FL+FD+PG        | -0.03                | 0.08      | 0.68     | -0.98               | 3.23      | 0.76     |
| Obese X FL+FD+PG          | 0.07                 | 0.08      | 0.41     | 4.30                | 3.34      | 0.20     |
| Overwt. X FL X Wave       | 0.04                 | 0.03      | 0.17     | 0.93                | 0.95      | 0.33     |
| Obese X FL X Wave         | -0.02                | 0.03      | 0.49     | -0.53               | 1.06      | 0.62     |
| Overwt. X FL+FD X Wave    | 0.06                 | 0.03      | 0.03     | 1.91                | 1.00      | 0.06     |
| Obese X FL+FD X Wave      | 0.02                 | 0.03      | 0.63     | -0.60               | 1.15      | 0.60     |
| Overwt. X FL+PG X Wave    | 0.02                 | 0.03      | 0.42     | 0.75                | 0.98      | 0.45     |
| Obese X FL+PG X Wave      | -0.02                | 0.03      | 0.59     | -1.29               | 1.04      | 0.21     |
| Overwt. X FL+FD+PG X Wave | -0.02                | 0.03      | 0.49     | -1.21               | 0.93      | 0.19     |
| Obese X FL+FD+PG X Wave   | -0.06                | 0.03      | 0.07     | -3.02               | 1.04      | 0.00     |
| Random-effects Parameters | SD                   | SE        | —        | SD                  | SE        | —        |
| School Level Intercept    | 0.03                 | 0.02      | —        | 0.63                | 1.55      | —        |
| Student Level Intercept   | 0.18                 | 0.01      | —        | 8.22                | 0.30      | —        |
| Residual                  | 0.17                 | 0.00      | —        | 5.61                | 0.10      | —        |

*Note.* <sup>a</sup>Raw BMI is log transformed for skew. <sup>b</sup>BMI-% is s the log percent distance from median BMI. FL = family lifestyle, FD = family dynamics, PG = peer group. The test of *p* is a basic z-test for *B*/*SE*.
